# Supplementary material
Source: Springer Nature journal article supplement (https://www.springermedizin.de/resource/supplementary/12955_2009_650_MOESM3_ESM.pdf/9560998)

(a)  $p_F = 0, \mu_T - \mu_R = 0$

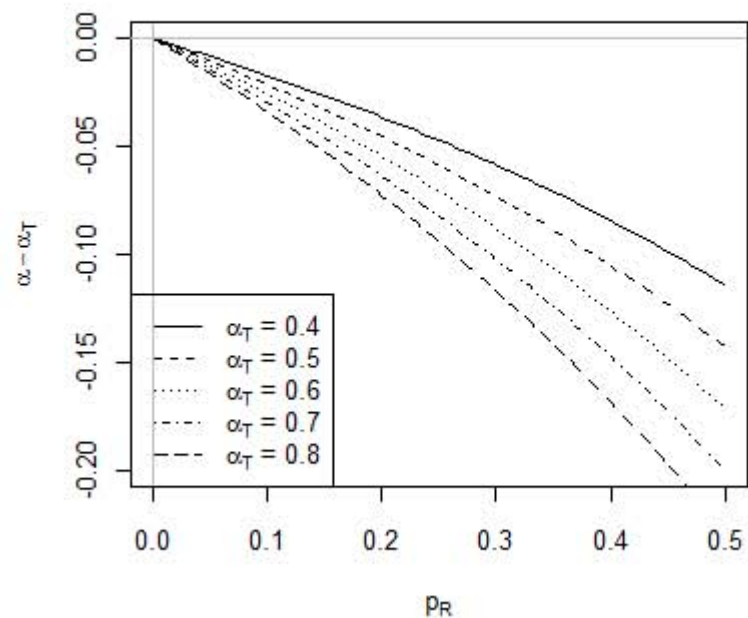

(b)  $p_F = 0.05, \mu_T - \mu_R = 0$

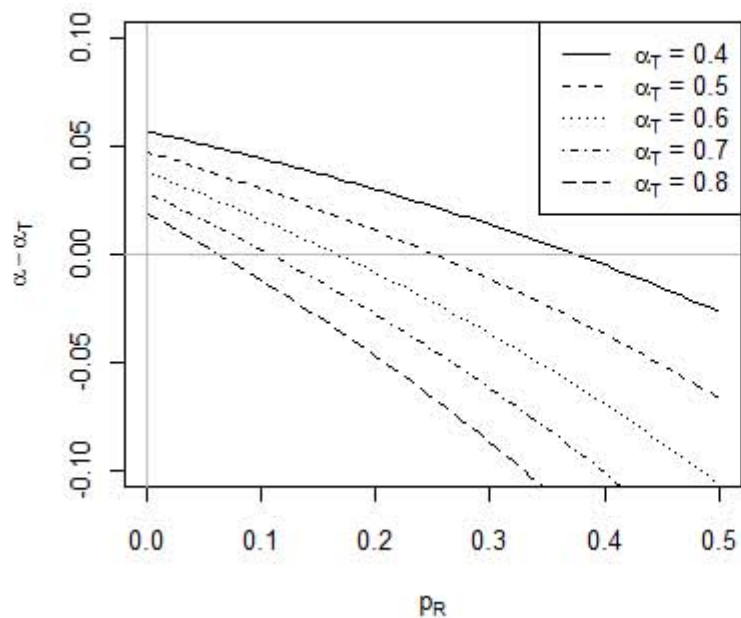

(c)  $p_F = 0, \mu_T - \mu_R = 1$

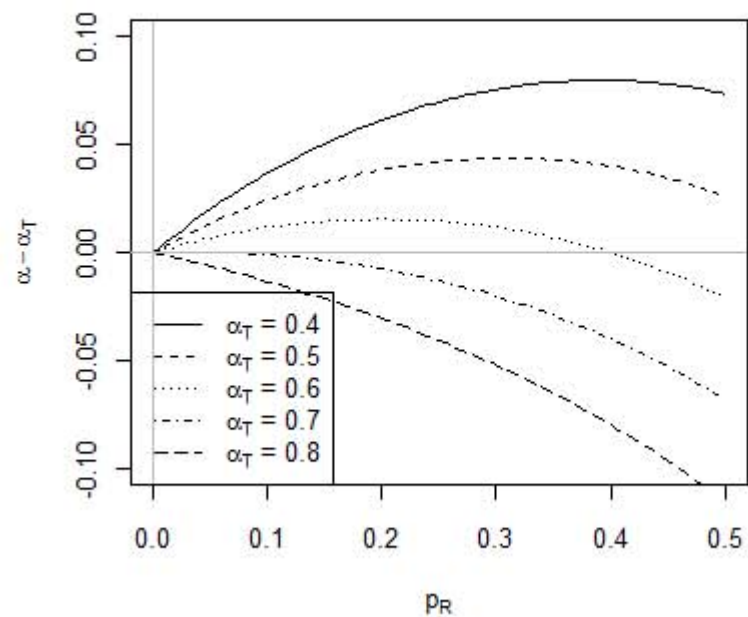

(d)  $p_F = 0.05, \mu_T - \mu_R = 1$

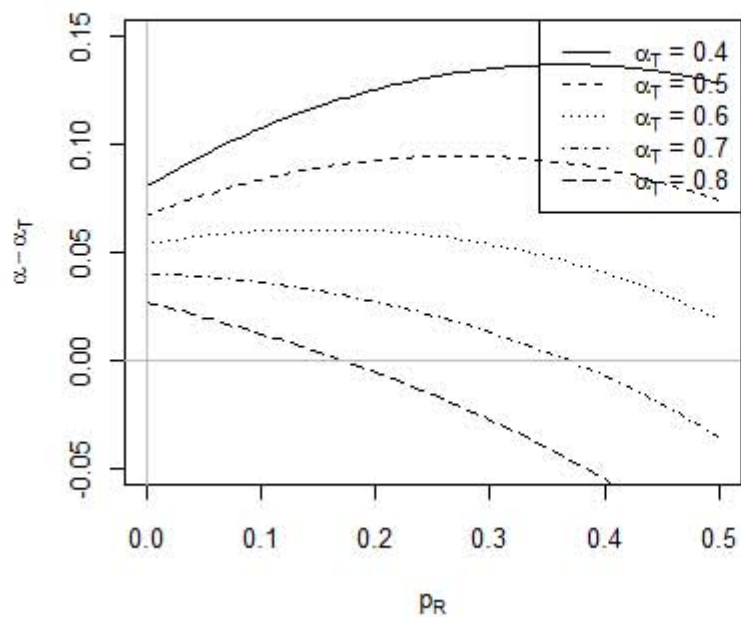

Supplement: MOESM3 [file 9560998]
